# Supplementary material for: Assessing cell-specific effects of genetic variations using tRNA microarrays
Source: BMC Genomics. 2019 Jul 16;20(Suppl 8):549. doi: 10.1186/s12864-019-5864-1 (PMC6632033; doi:10.1186/s12864-019-5864-1)
Supplement: Supplementary file 2 — Source data tRNA microarrays. (XLSX 18 kb) [file 12864_2019_5864_MOESM2_ESM.xlsx]

## Sheet: DataAllPlots
Probe	AminoAcid	HBE Rep1	HBE Rep2	CFBE Rep1	CFBE Rep2	CFBE Rep3	FRT Rep1	FRT Rep2	FRT Rep3	Organoids Rep1	Organoids Rep2	HNE NL117 Rep1	HNE NL117 Rep2	HNE NL124 Rep1	HNE NL124 Rep2
Arg1h	Arg-ICG	2.66639	3.35182	0.020647	0.0208764	0.0171851	0.0307917	0.0302713	0.0301109	0.775484	0.820727	0.938829	0.865355	3.04779	0.99988
Arg2h	Arg-C/UCG	1.09082	2.69354	0.0259341	0.0237055	0.0301276	0.0154109	0.0145647	0.0163668	0.831509	0.742666	0.627859	0.622239	1.04887	1.62947
Arg3h	Arg-CCU	1.58854	2.34193	0.0280958	0.027646	0.0189033	0.030985	0.0303224	0.0338396	1.06201	0.891498	0.489847	0.5177	0.627196	1.17278
Arg4h	Arg-UCU	1.64375	1.98015	0.023958	0.0234023	0.0223605	0.031106	0.0304096	0.0311841	0.615662	0.671289	0.592163	0.595406	1.15375	1.96633
His1h	His-GUG	3.3416	2.33128	0.0221207	0.0232728	0.0190386	0.0134125	0.0153878	0.0117647	0.784695	1.01851	0.680507	0.670558	1.30725	1.40346
Lys1h	Lys-CUU	0.607163	1.69951	0.0213995	0.0208554	0.0286727	0.0269197	0.0279197	0.0282986	0.568725	0.617078	0.676149	0.707318	1.25956	1.8533
Lys2h	Lys-UUU1	1.54099	1.97944	0.0242841	0.0228523	0.0106964	0.019622	0.0192729	0.0201988	0.162694	0.202028	0.637128	0.702386	1.10222	1.69996
Lys3h	Lys-UUU2	1.83556	2.03039	0.0272464	0.0274789	0.0135998	0.0212501	0.0202282	0.0207734	0.920276	0.964199	0.796916	0.853667	1.34997	1.89562
Lys4h	Lys-UUU3	4.22372	5.30001	0.0207619	0.0170227	0.0391671	0.0112545	0.00893371	0.0122792	0.497331	0.353271	0.82708	0.851512	1.31468	2.05033
Asp1h	Asp-GUC	3.31521	1.99928	0.0155405	0.0116782	0.0114902	0.0261233	0.0284515	0.036522	0.627155	0.73101	0.668502	0.741754	2.46693	2.37603
Glu1h	Glu-UUC	1.12249	0.968887	0.0143064	0.0124601	0.0276764	0.0104564	0.0106933	0.0119483	0.748729	0.680283	0.57051	0.600701	1.90337	1.98856
Glu2h	Glu-C/UUC	6.06202	2.90357	0.0397137	0.029399	0.0134031	0.0264665	0.0274197	0.0285283	0.975958	1.04386	0.525248	0.528952	2.07872	2.08487
Asn1h	Asn-GUU	2.67822	1.86213	0.0200679	0.0180073	0.019136	0.0156666	0.0158503	0.0181356	0.620774	0.840371	0.631227	0.629789	1.44562	1.91079
Cys1h	Cys-UGU/C	1.35916	2.53832	0.020802	0.019291	0.0344447	0.0344237	0.0366714	0.0346558	0.842436	0.814295	0.776279	0.881195	0.647104	1.02487
Gln1h	Gln-C/UUG	1.53013	2.5338	0.0215479	0.0179311	0.0156473	0.0247929	0.0270808	0.0294957	0.675458	0.806989	0.63245	0.684564	1.05658	1.62561
Ser1h	Ser-CGA	2.06836	2.43626	0.0222004	0.018698	0.0271879	0.0197867	0.018855	0.0223036	0.540394	0.674959	0.513618	0.542163	1.16632	1.75008
Ser2h	Ser-A/G/UGA	2.66579	3.24711	0.0232954	0.0184202	0.0287978	0.0195984	0.018478	0.0201087	0.548976	0.749772	0.550774	0.55865	1.32591	1.93434
Ser3h	Ser-GCU	1.43114	2.06396	0.0228992	0.0206827	0.0126624	0.0276781	0.0282267	0.0296263	0.883401	1.02711	0.673331	0.727782	1.2177	1.89032
Thr1h	Thr-A/CGU	1.76766	2.40745	0.0229941	0.02574	0.0208502	0.0245387	0.0237233	0.0237786	0.656767	0.739085	0.768936	0.832257	0.730371	1.25658
Thr2h	Thr-UGU	1.56956	1.83979	0.027898	0.0280046	0.0259972	0.0242765	0.0244758	0.0250473	1.03426	1.07371	0.540661	0.600037	0.539772	1.0715
Thr5h	Thr-CGU	2.40245	2.64316	0.0238701	0.0260605	0.0347977	0.0306691	0.0310147	0.0356149	1.58303	0.638994	0.548346	0.608983	0.57773	1.26571
Ala1h	Ala-IGC	3.22397	2.24628	0.0354383	0.0333091	0.0581511	0.0718731	0.0538794	0.0392388	0.554851	0.827853	1.82776	1.97221	1.83987	1.85511
Ala2h	Ala-A/C/UGC	2.55295	1.60502	0.0370906	0.0457195	0.025599	0.0169862	0.0158134	0.0135781	0.944771	1.13202	0.525512	0.596436	0.519974	0.811827
Gly1h	Gly-G/CCC	0.753834	0.941509	0.0170433	0.0166486	0.0200949	0.0162905	0.0190462	0.0206602	0.998029	1.04013	0.615321	0.680502	0.657423	1.02721
Gly2h	Gly-UCC	1.07038	2.0227	0.0215048	0.0250253	0.0120408	0.01135	0.0126107	0.0101263	0.609997	0.762721	0.583851	0.654228	0.597107	0.952121
Ile1h	Ile-IAU	3.97046	2.67057	0.029823	0.0323887	0.019078	0.0180609	0.0205326	0.0181453	0.854491	1.28731	0.824244	0.914033	0.969268	1.39399
Ile2h	Ile-UAU	4.39285	3.41709	0.0264274	0.0296328	0.0396384	0.0277663	0.0305205	0.0286082	0.489662	0.670082	0.731413	0.830257	0.867768	1.39079
Leu1h	Leu-A/UAG	1.80869	1.8186	0.0247326	0.0260782	0.0213281	0.0124478	0.0121781	0.0105137	0.665198	0.916094	0.430098	0.51577	0.435763	0.775213
Leu2h	Leu-CAG	2.747	2.3436	0.0244338	0.0269723	0.0175854	0.024965	0.0290075	0.0219379	0.77447	1.14845	0.625587	0.656301	0.810655	1.36553
Leu3h	Leu-CAA	1.55998	2.14534	0.0243864	0.0298288	0.0132926	0.0140374	0.015009	0.0110306	0.726053	1.01183	0.569167	0.585494	0.764737	1.26847
Leu4h	Leu-UAA1	3.26975	2.6487	0.022929	0.0239707	0.0248728	0.0469902	0.0453092	0.0386261	0.597136	0.809214	0.686215	0.724006	1.69095	2.35487
Leu6h	Leu-UAA2	1.22324	1.38878	0.0203055	0.0219651	0.0319195	0.0056794	0.00426624	0.00425563	0.830764	0.651326	1.23124	1.09767	1.0006	1.92382
Met1h	Meti-CAU	1.79025	2.93236	0.029484	0.0344146	0.0151307	0.0203618	0.0215854	0.0188657	0.923431	1.09655	0.975165	1.11911	1.43812	2.18874
Met2h	Met-CAU	5.66267	5.85388	0.0286242	0.0324618	0.0649132	0.0125561	0.0123908	0.0124688	0.548648	0.705215	0.865939	0.914933	0.887882	1.46411
Phe1h	Phe-GAA	2.31941	3.32679	0.0292725	0.0345982	0.0587091	0.0154678	0.0177166	0.0133141	0.632295	1.26147	0.818782	0.905194	0.888401	1.25872
Pro1h	Pro-A/C/UGG	2.18296	1.73851	0.0244837	0.0202017	0.0420179	0.0424117	0.0407223	0.0521826	0.924582	0.862861	0.840125	0.892488	1.4079	2.40226
Trp1h	Trp-CCA	3.01542	2.8266	0.028163	0.0210971	0.020454	0.0227275	0.0221197	0.0192239	1.05376	1.37308	0.700927	0.786488	0.720138	1.15403
Tyr2h	Tyr-GUA	6.68448	3.97024	0.0239093	0.016813	0.013324	0.0468301	0.0469352	0.0539814	0.944446	1.00058	0.845125	0.974001	3.29943	2.93004
Val1h	Val-mAC	2.20623	2.47375	0.0323358	0.0399464	0.0135734	0.0130307	0.0149872	0.0125699	0.607008	0.968825	0.62638	0.667049	1.16549	1.68878
Val4h	Val-UAC	3.05476	2.47788	0.0300296	0.0354432	0.0164352	0.0229986	0.0241189	0.020244	0.843466	1.11077	0.543641	0.657838	0.61498	0.973285
